# Supplementary material
Source: publisher site journal article supplement (https://www.dovepress.com/article/433424)
Supplement: Supplementary file 1 [file get_supplementary_file.php]

**Results**

**Nomogram development and comparisons of other staging systems**

To develop a nomogram, we used the cox regression model to screen these parameters, and selected the most accessible factors in clinical practice as prognostic factors: ANC, SIRI, LMR, NLR. A Nomogram to predict the 1-, 3-, and 4- year survival rates was proposed based on results of the cox regression model (Supplementary Fig. 1). In analysis of 1 year survival rates, the AUC of the nomogram was 0.804 (0.68 - 0.93), which was higher than that of ISS 0.67 (0.53 - 0.81). In analysis of 3 years survival rates, the AUC of the nomogram was 0.66 (0.52 - 0.76). In analysis of 4 years survival rates, the AUC of the nomogram was 0.66 (0.51 - 0.80), which was higher than that of ISS 0.61 (0.47 - 0.75) (Supplementary Fig. 2A, B, C). The calibration curve revealed that the 1-, 3- and 4- year survival rates predicted by the nomogram were highly consistent with the actual observation results (Supplementary Fig. 3A), indicating that the nomogram has reliable repeatability.

**Validation of the nomogram**

The stepwise nomogram was further validated using internal bootstrap validation.

The 1-, 3- and 4-year survival rates revealed by the calibration curves of the nomogram were graphically consistent with the actual observations (Supplementary Fig. 3B). In general, our model showed a good fitting and calibration with the ideal curve.

**
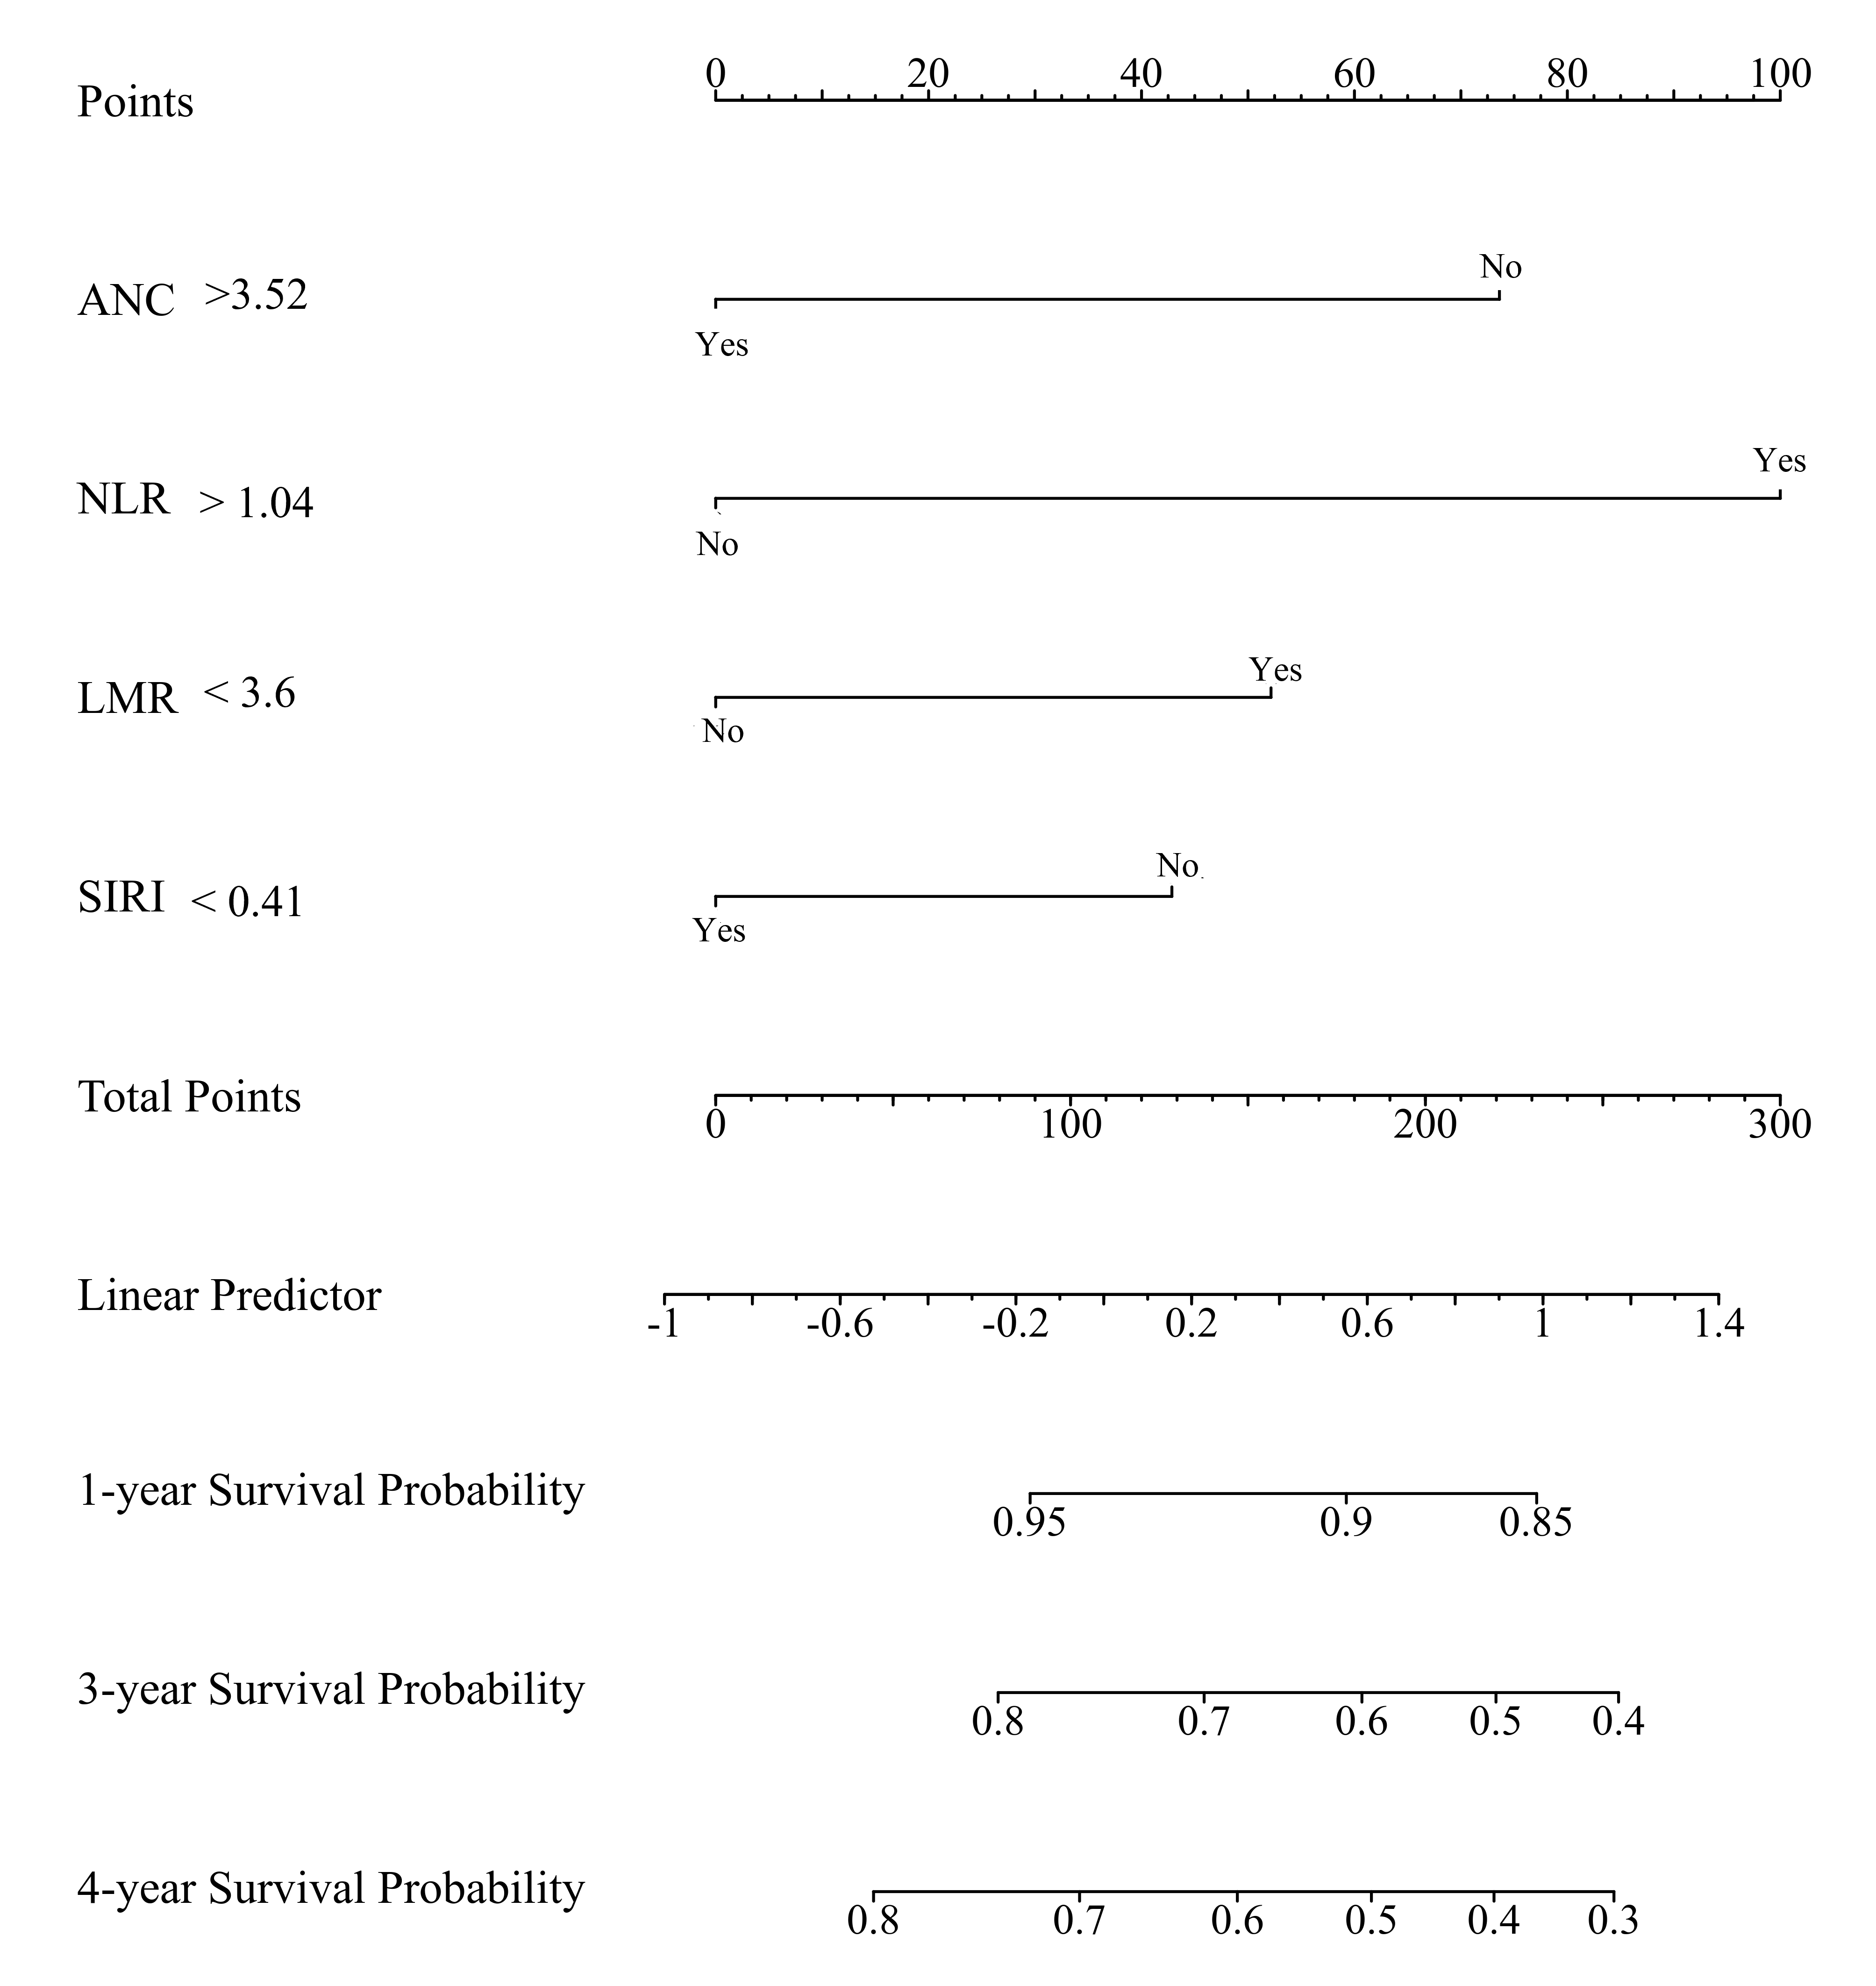
**

**Supplementary Figure 1** Nomogram prediction of PFS of MM after ASCT.

**B**

**A**


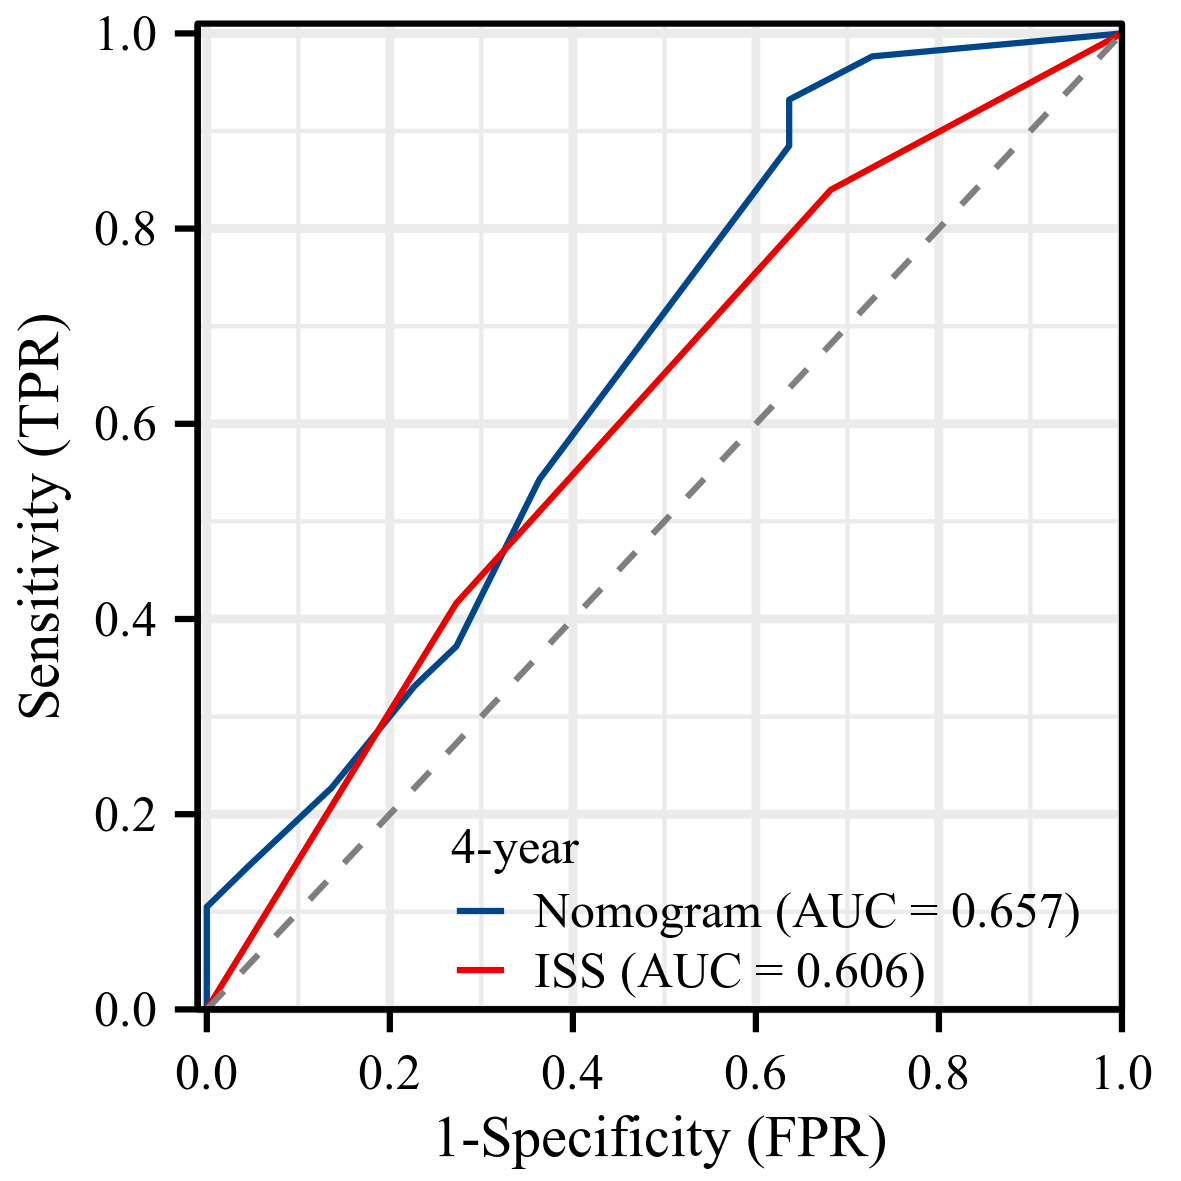

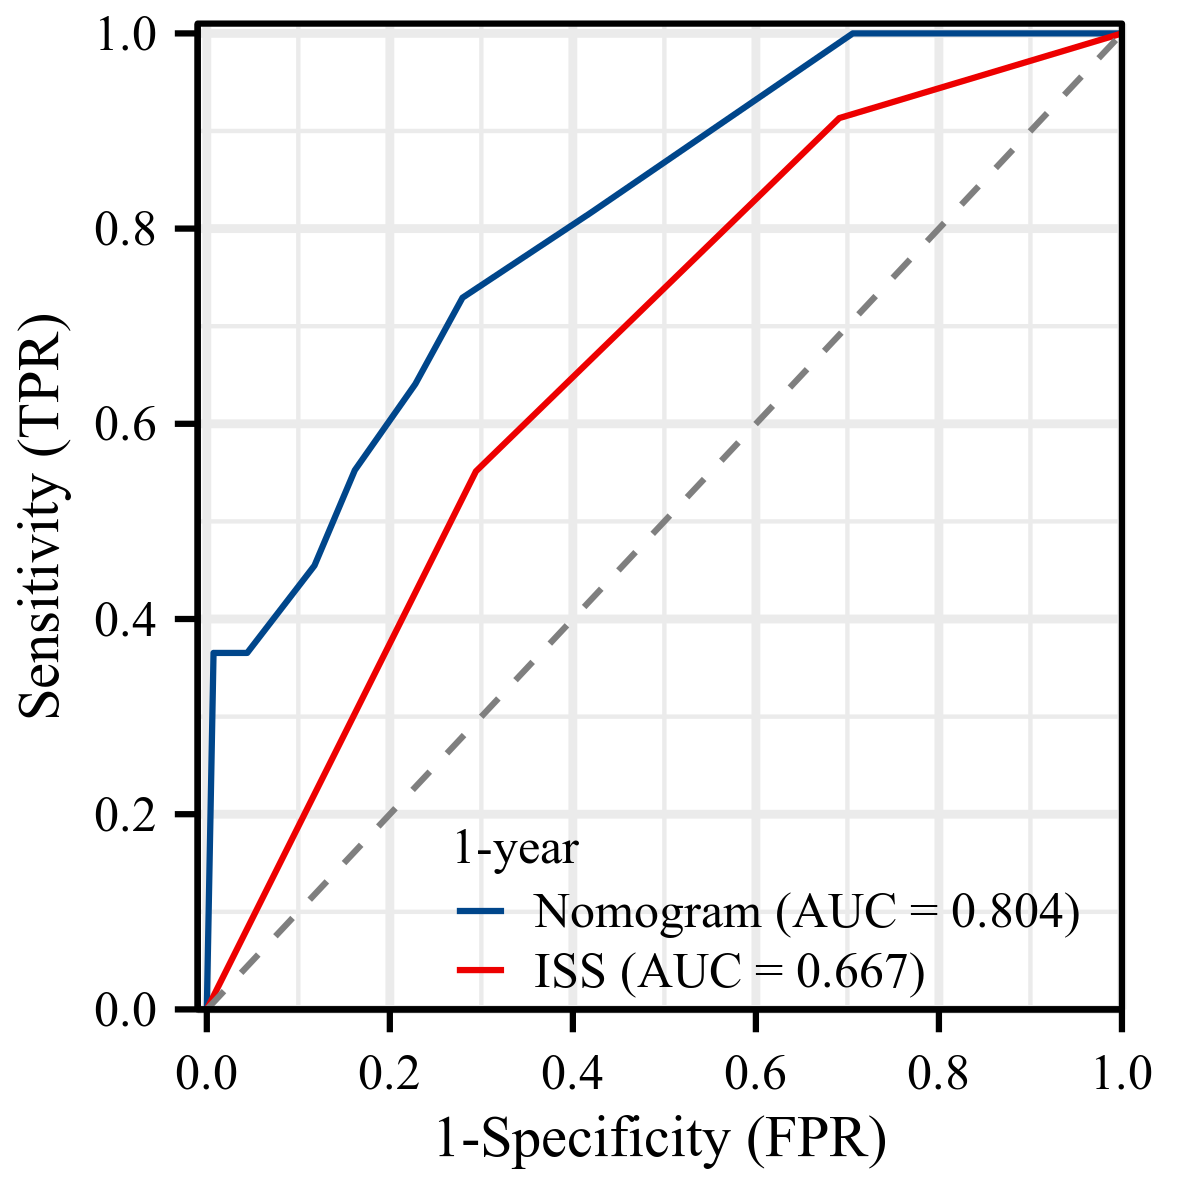

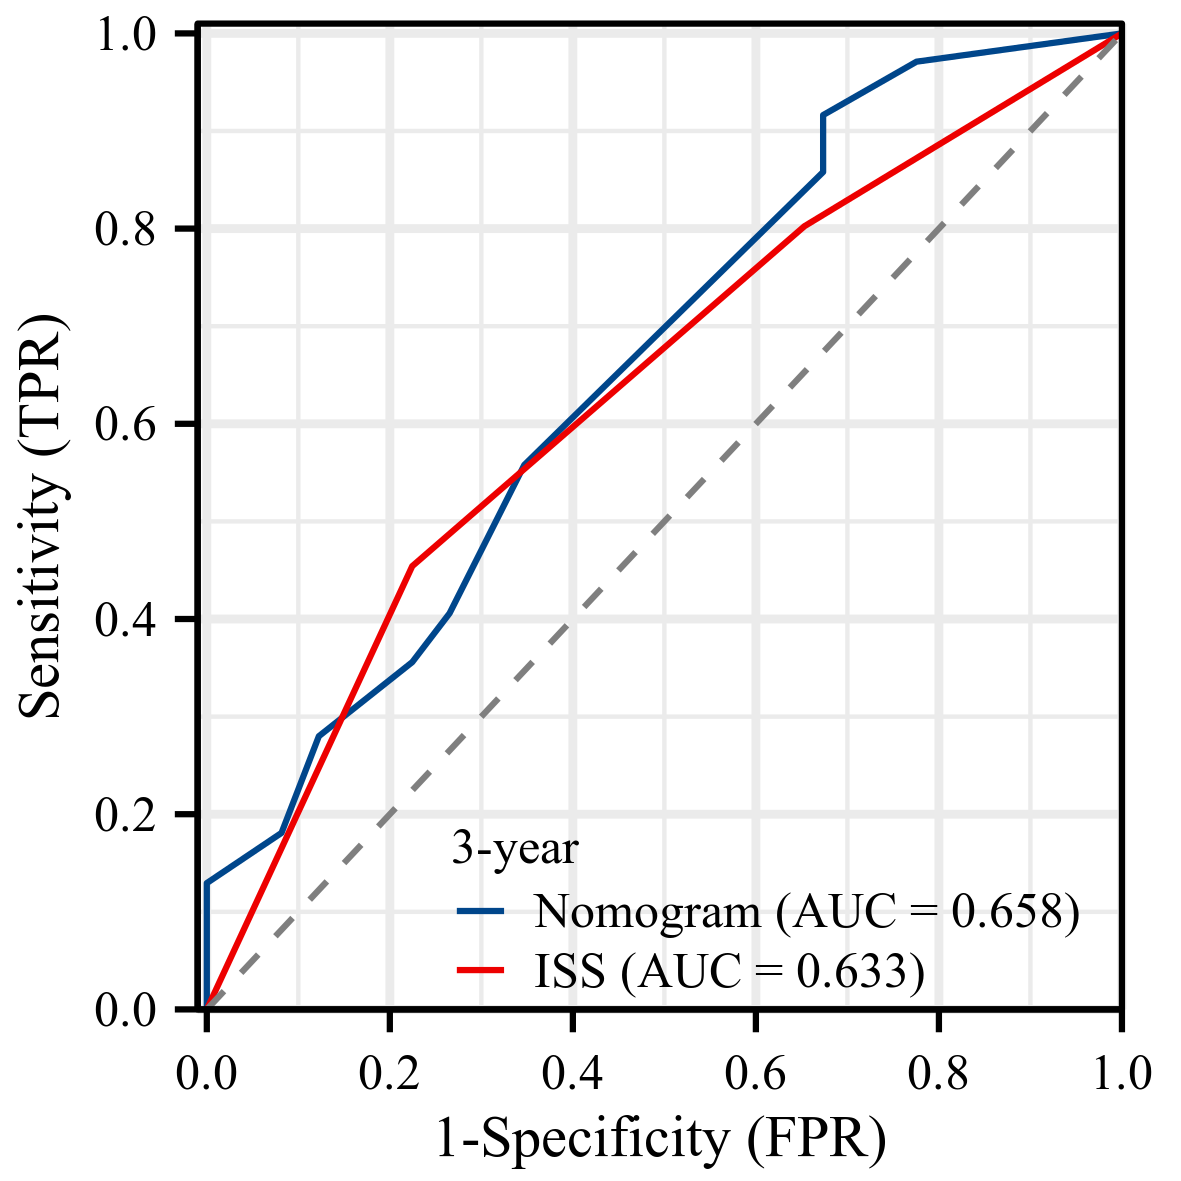


**C**

**Supplementary Figure 2** The AUCs of ISS and nomogram predicted 1-year(A), 3-year (B) and 4-year (C) survival rates by ROC analysis in the cohort.


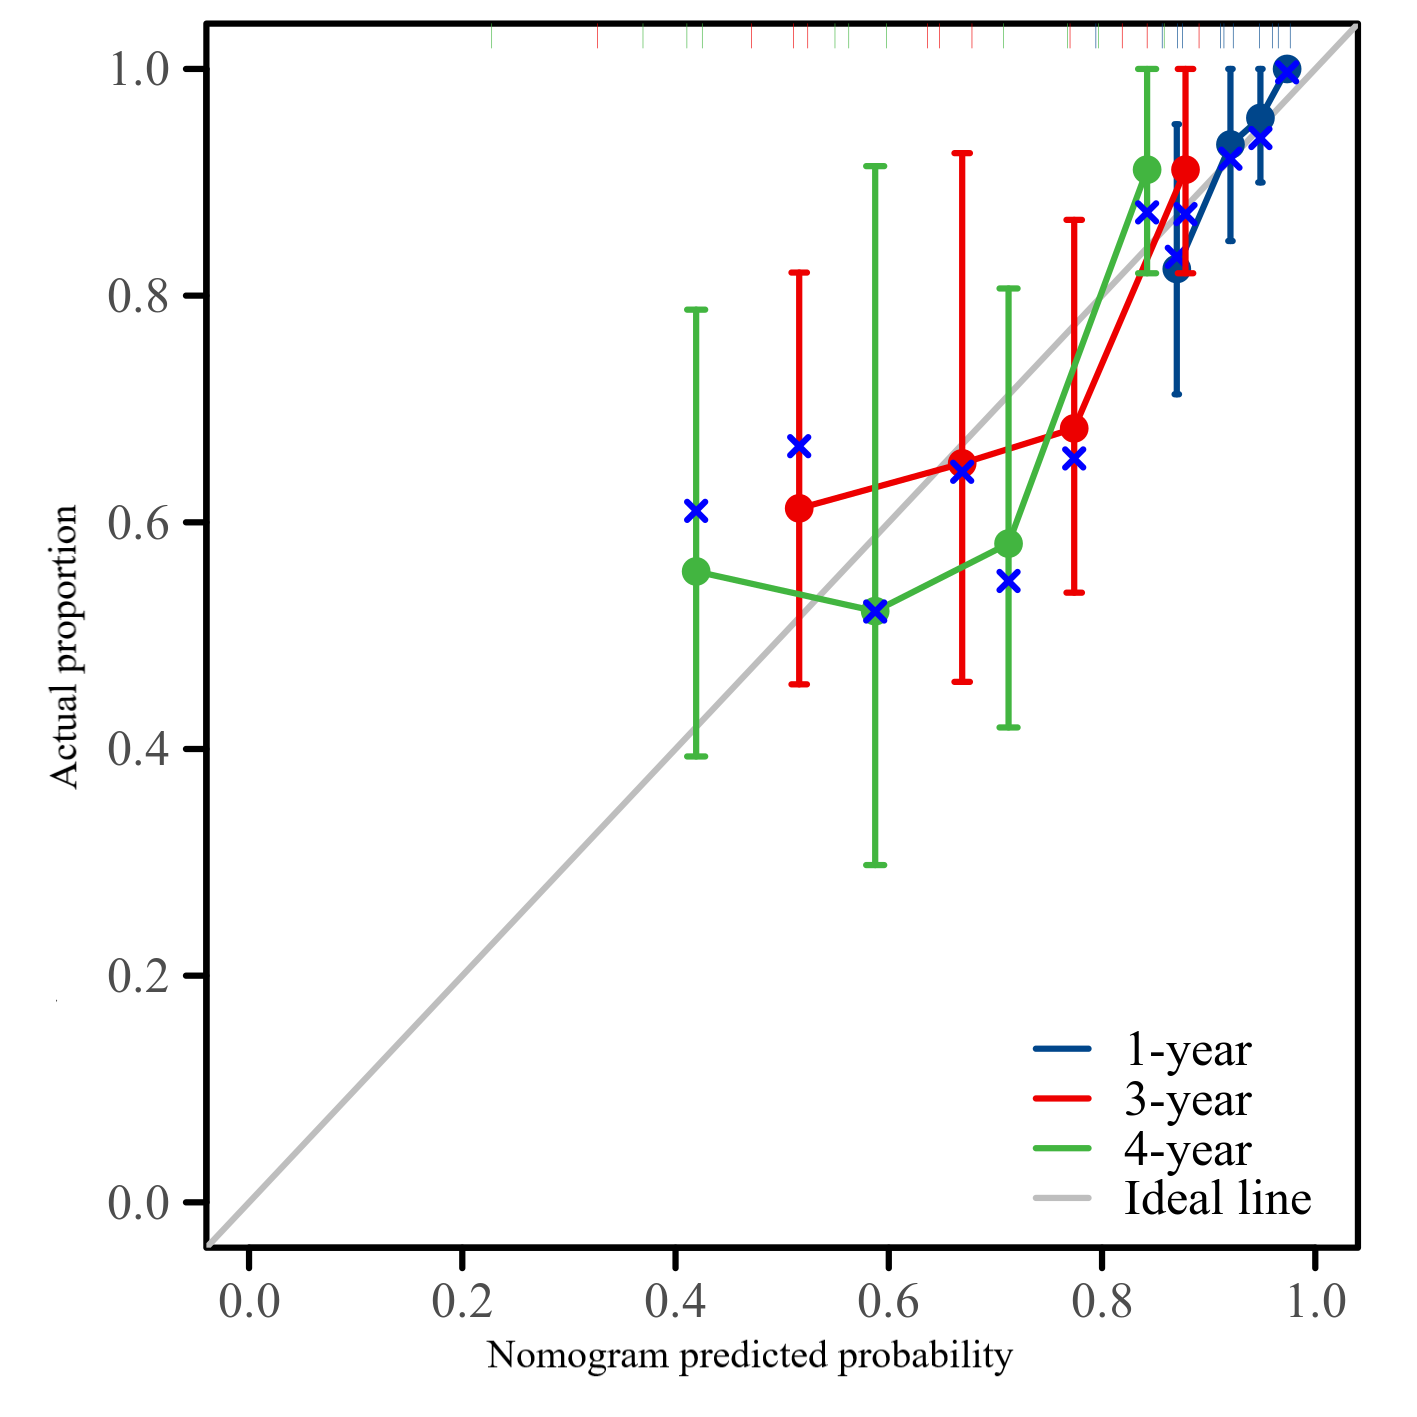

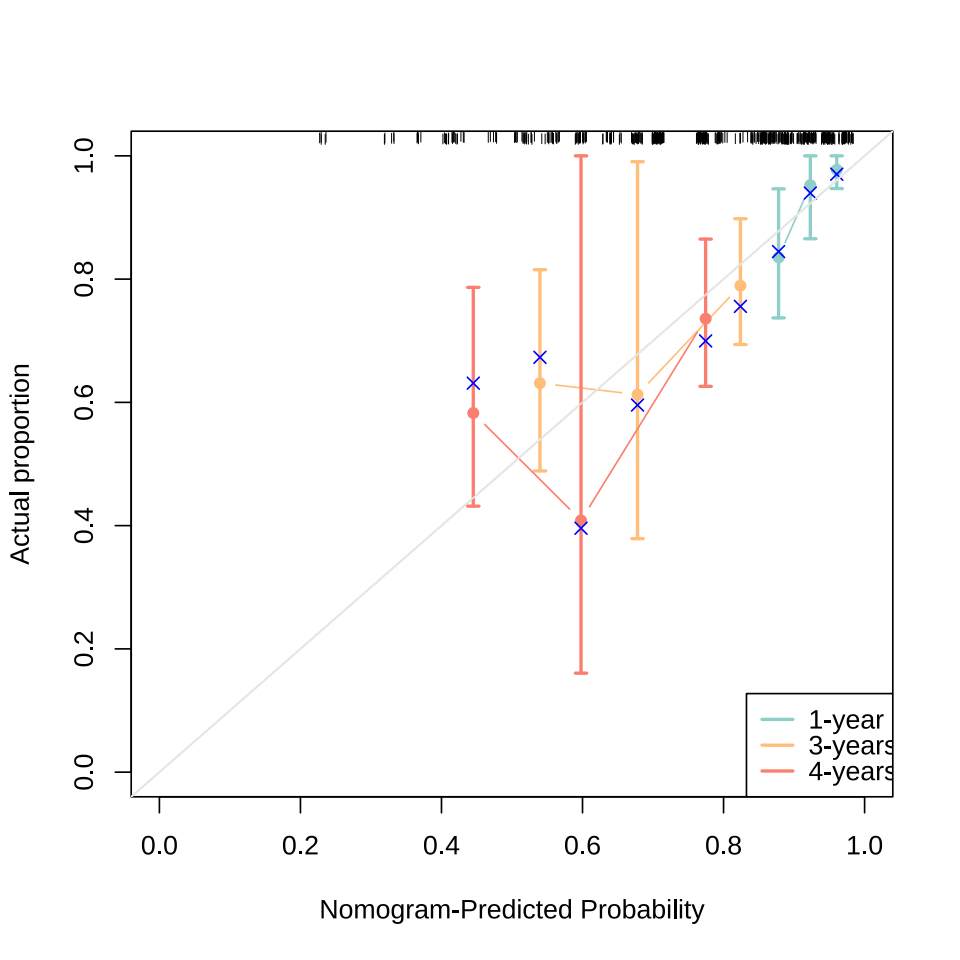


**A**

**B**

**Supplementary Figure 3** The Calibration plots of the nomogram at 1-year, 3-year and 4-year in the cohort (A). The Calibration curve for predicted probability of the nomogram was measured by bootstrapping for 1000 repetitions (B). The X axis is the predicted probability of the nomogram, and the Y axis is the observed probability.
